# Supplementary material for: An Al-Driven Framework for Personalized and Diversified Teaching Strategies in Medical Education: A Cross-Sectional Study
Source: Research Square preprint supplement (doi:10.21203/rs.3.rs-7554669/v1), 2025-10-13
Supplement: Supplementary file 1 [file f8de149d4b8b88d8f935a2ed.docx]

**Additional file 1: List of Survey Variables**

The survey instrument was developed by the research team for this study. The key variables collected are listed below.

**Part 1: Demographic Information**

- Gender (X1)
- Year of Enrollment (X2)

**Part 2: Learning-Related Factors**

- Online/Offline Teaching Tendency (X3)
- Online Learning Tool (X4)
- Online Learning Software (X5)
- Online Network Support (X6)
- Form of Internship/Experimental Class (X7)
- How to deal with problems in online learning (X8)
- Learning Atmosphere Satisfaction (X9)
- Teaching Satisfaction (X10)
- Independent Learning Ability (X11)
- Conscious Mental State (X12)

**Dependent Variable**

- Online Course Adaptability (Y)
